# Supplementary material for: National Burden and Trends for 29 Groups of Cancer in Mexico from 1990 to 2019: A Secondary Analysis of the Global Burden of Disease Study 2019
Source: MDPI journal article supplement (doi:10.3390/cancers16010149), 2023-12-28
Supplement: s1 [file s1]

## Supplementary Information

|                                                                                                                                                                                             |    |
|---------------------------------------------------------------------------------------------------------------------------------------------------------------------------------------------|----|
| <b>Supplementary Figure S1.</b> Cancer-specific trends and annual percentage change from 1990 to 2019 of the age-standardized incidence rates (per 100,000 people) in Mexico. ....          | 2  |
| <b>Supplementary Figure S2.</b> Cancer-specific annual percentage changes from 1990 to 2019 of age-standardized incidence (a) and mortality (b) rates per 100,000 population in Mexico..... | 3  |
| <b>Supplementary Figure S3.</b> Cancer-specific incidence rates (a) and age-standardized mortality rates (per 100,000 people) by sex (b) in Mexico in 2019. ....                            | 4  |
| <b>Supplementary Figure S4.</b> Age-specific incidence rates (per 100,000 people) by sex for each cancer group in Mexico during 2019.....                                                   | 5  |
| <b>Supplementary Table S1.</b> Total and sex-specific and age-standardized incidence and mortality rates (per 100,000 people) by cancer group in Mexico during 2019.....                    | 6  |
| <b>Supplementary Table S2.</b> Percentage change from 1990 to 2019 in crude incidence and mortality due to 29 malignant neoplasms in Mexico.....                                            | 8  |
| <b>Supplementary Table S3.</b> Percentage change from 1990 to 2019 of age-standardized incidence and mortality rates (per 100,000 population) due to 29 malignant neoplasms in Mexico.....  | 10 |

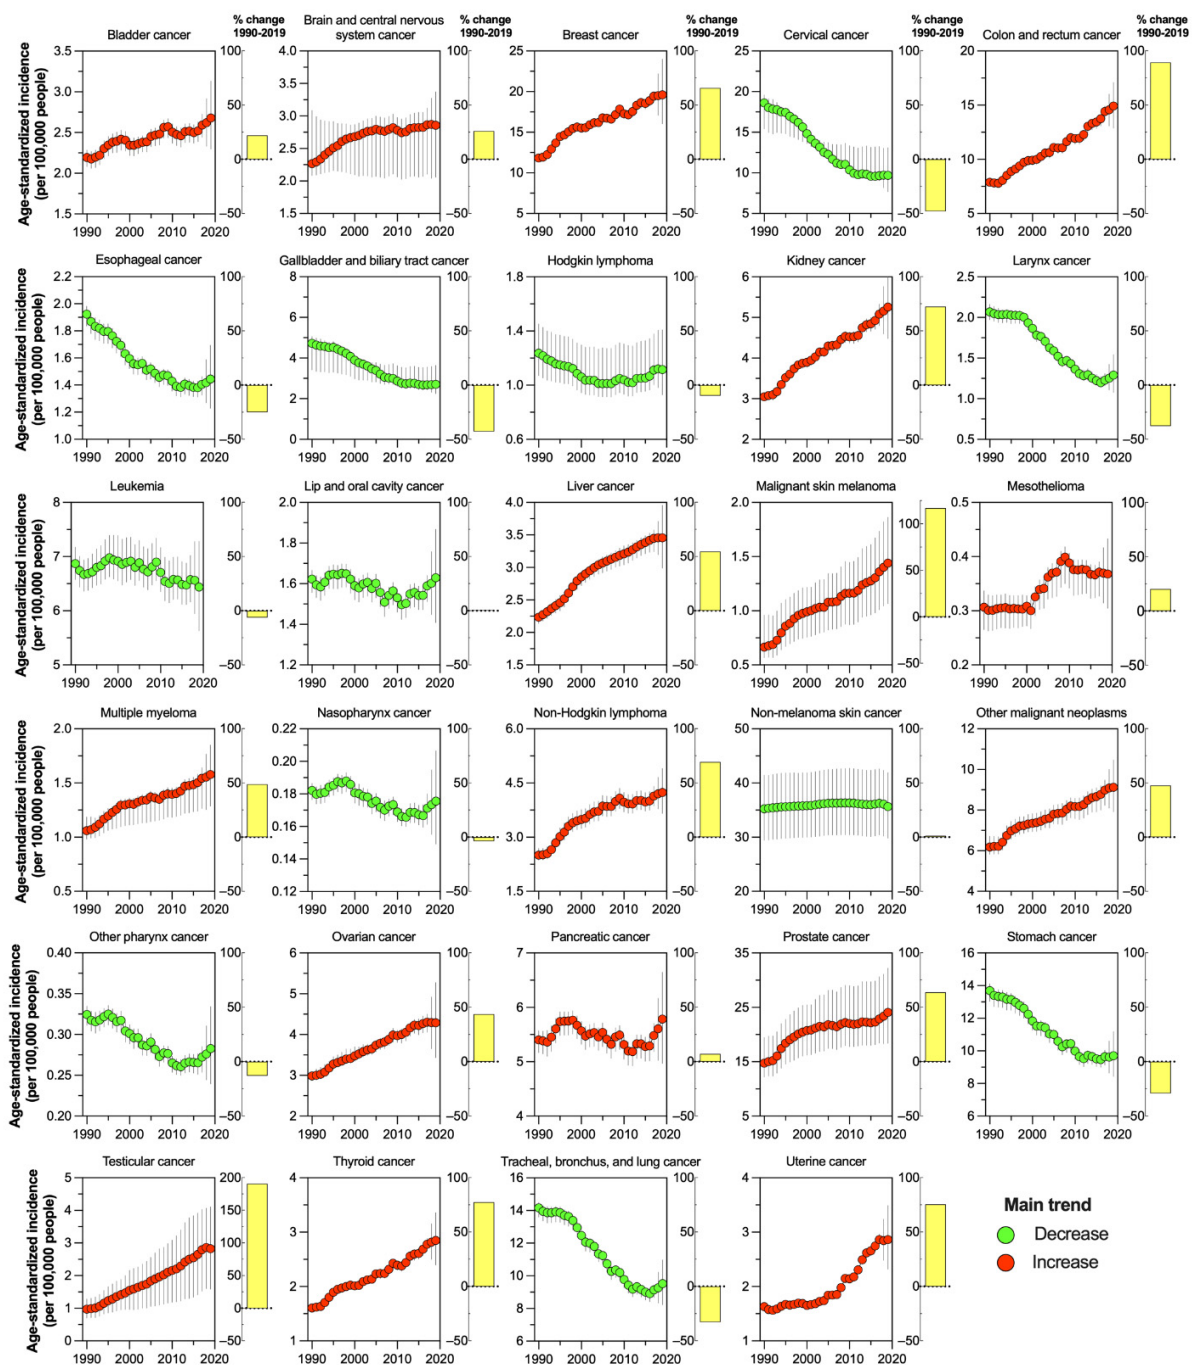

**Supplementary Figure S1.** Cancer-specific trends and annual percentage change from 1990 to 2019 of the age-standardized incidence rates (per 100,000 people) in Mexico.

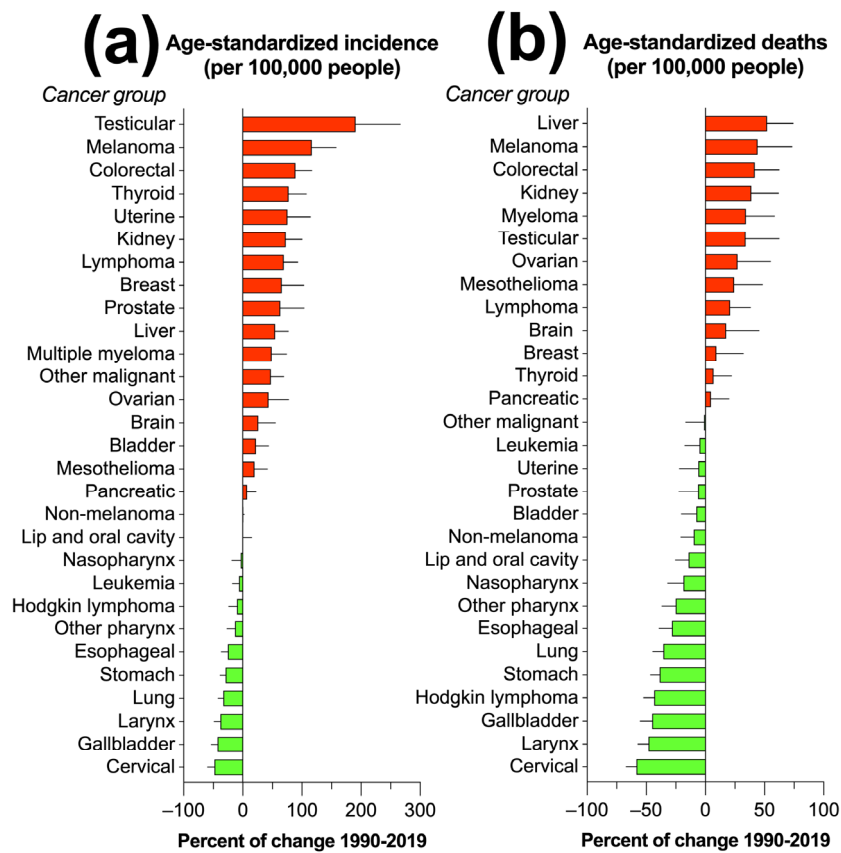

**Supplementary Figure S2.** Cancer-specific annual percentage changes from 1990 to 2019 of age-standardized incidence (a) and mortality (b) rates per 100,000 population in Mexico.

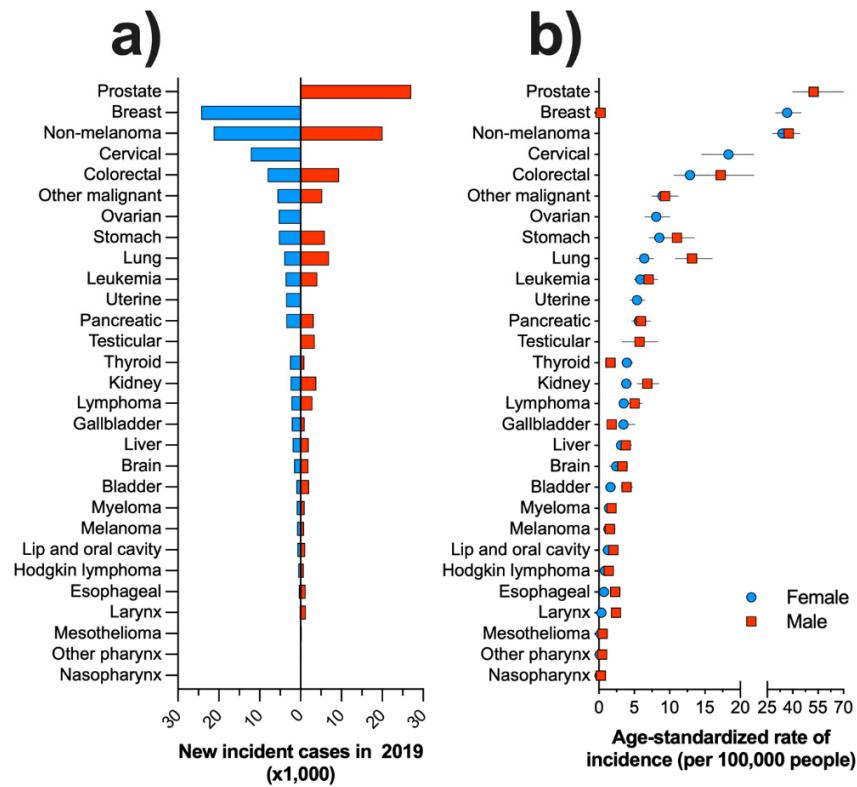

**Supplementary Figure S3.** Cancer-specific incidence rates (a) and age-standardized mortality rates (per 100,000 people) by sex (b) in Mexico in 2019.

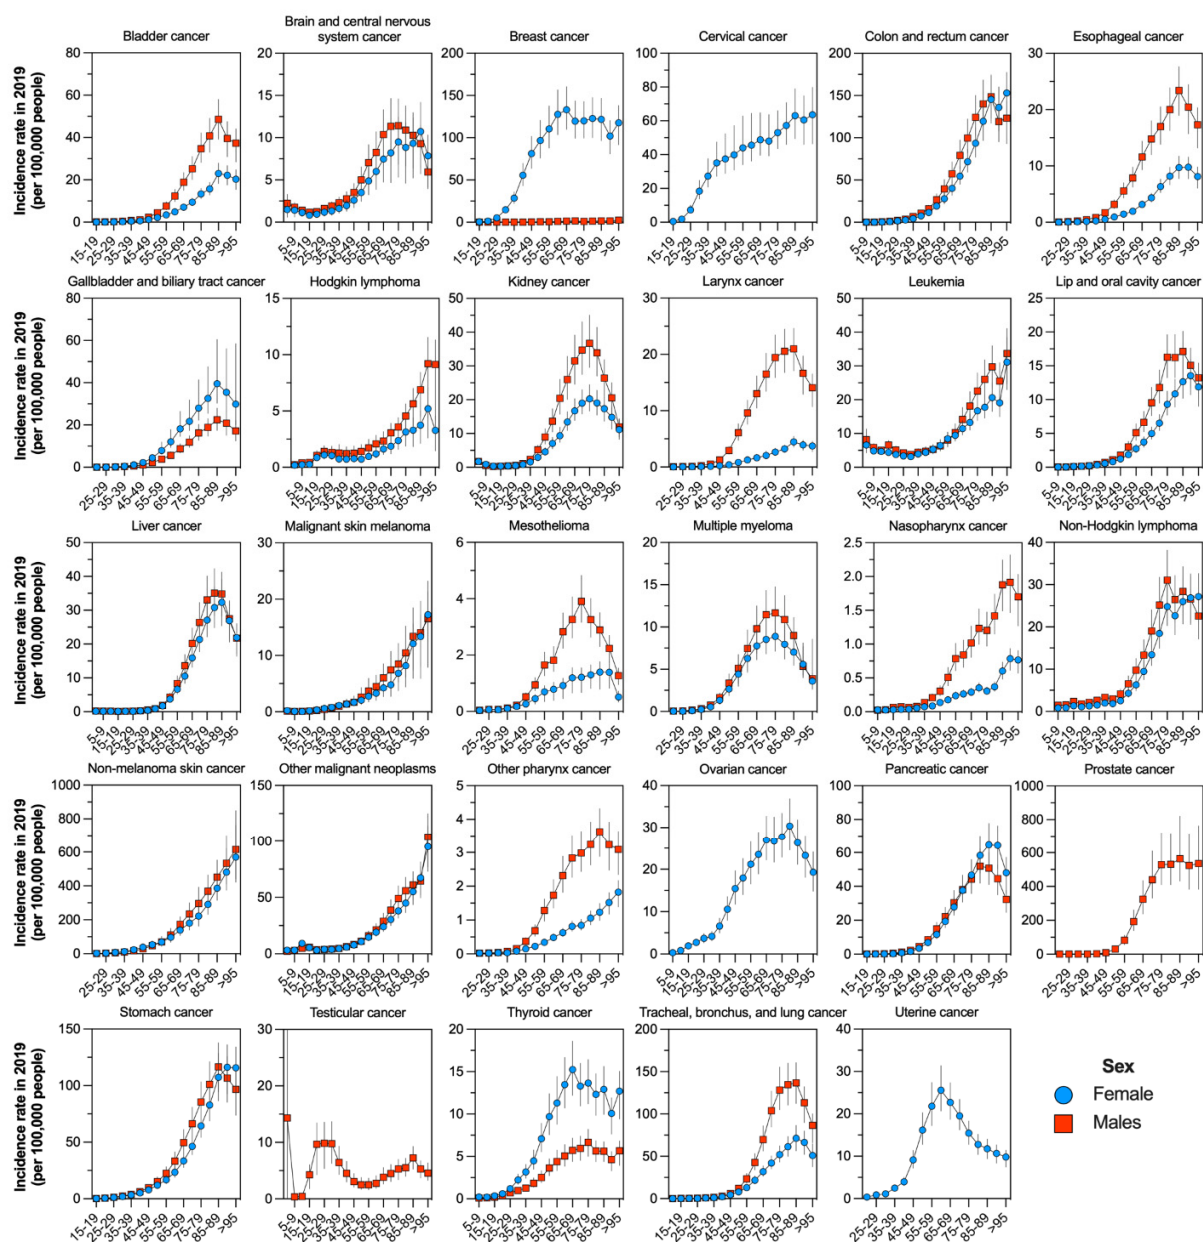

**Supplementary Figure S4.** Age-specific incidence rates (per 100,000 people) by sex for each cancer group in Mexico during 2019.

**Supplementary Table S1.** Total and sex-specific and age-standardized incidence and mortality rates (per 100,000 people) by cancer group in Mexico during 2019.

| Group of cancer                         | Incidence (per 100,000 people: 95% UI) |                        |                        | Deaths (per 100,000 people: 95% UI) |                        |                       |
|-----------------------------------------|----------------------------------------|------------------------|------------------------|-------------------------------------|------------------------|-----------------------|
|                                         | Total                                  | Female                 | Male                   | Total                               | Female                 | Male                  |
| Bladder cancer                          | 2.68 (2.30 to 3.13)                    | 1.64 (1.36 to 1.98)    | 3.90 (3.17 to 4.76)    | 1.52 (1.30 to 1.76)                 | 0.96 (0.80 to 1.16)    | 2.19 (1.80 to 2.63)   |
| Brain and central nervous system cancer | 2.86 (2.06 to 3.37)                    | 2.44 (1.50 to 3.08)    | 3.31 (2.31 to 4.07)    | 2.31 (1.68 to 2.72)                 | 1.94 (1.19 to 2.44)    | 2.72 (1.90 to 3.36)   |
| Breast cancer                           | 19.62 (16.03 to 23.99)                 | 36.81 (30.02 to 45.04) | 0.23 (0.19 to 0.29)    | 6.72 (5.59 to 8.14)                 | 12.48 (10.35 to 15.16) | 0.14 (0.11 to 0.17)   |
| Cervical cancer                         | 9.68 (7.68 to 13.11)                   | 18.34 (14.55 to 24.83) | -                      | 5.08 (4.10 to 6.74)                 | 9.53 (7.68 to 12.64)   | -                     |
| Colon and rectum cancer                 | 14.92 (12.88 to 17.11)                 | 12.90 (10.60 to 15.63) | 17.22 (14.15 to 21.16) | 9.24 (7.95 to 10.52)                | 8.09 (6.70 to 9.66)    | 10.55 (8.69 to 12.73) |
| Esophageal cancer                       | 1.44 (1.23 to 1.69)                    | 0.72 (0.60 to 0.87)    | 2.28 (1.85 to 2.78)    | 1.51 (1.28 to 1.75)                 | 0.75 (0.62 to 0.90)    | 2.40 (1.93 to 2.91)   |
| Gallbladder and biliary tract cancer    | 2.71 (2.25 to 3.64)                    | 3.46 (2.76 to 5.09)    | 1.83 (1.44 to 2.31)    | 2.57 (2.14 to 3.43)                 | 3.28 (2.59 to 4.83)    | 1.74 (1.35 to 2.20)   |
| Hodgkin lymphoma                        | 1.11 (0.93 to 1.41)                    | 0.88 (0.67 to 1.33)    | 1.37 (1.09 to 1.75)    | 0.53 (0.44 to 0.67)                 | 0.40 (0.30 to 0.57)    | 0.67 (0.53 to 0.85)   |
| Kidney cancer                           | 5.26 (4.48 to 6.13)                    | 3.87 (3.22 to 4.66)    | 6.85 (5.44 to 8.46)    | 2.97 (2.51 to 3.46)                 | 2.07 (1.72 to 2.49)    | 4.01 (3.15 to 4.99)   |
| Larynx cancer                           | 1.29 (1.08 to 1.54)                    | 0.35 (0.28 to 0.47)    | 2.39 (1.93 to 2.91)    | 0.99 (0.82 to 1.18)                 | 0.27 (0.22 to 0.36)    | 1.84 (1.49 to 2.22)   |
| Leukemia                                | 6.44 (5.63 to 7.28)                    | 5.88 (4.98 to 6.93)    | 7.04 (5.96 to 8.29)    | 4.37 (3.84 to 4.95)                 | 3.88 (3.30 to 4.56)    | 4.92 (4.11 to 5.85)   |
| Lip and oral cavity cancer              | 1.63 (1.41 to 1.87)                    | 1.26 (1.05 to 1.52)    | 2.05 (1.67 to 2.49)    | 0.98 (0.84 to 1.11)                 | 0.72 (0.60 to 0.87)    | 1.27 (1.05 to 1.53)   |
| Liver cancer                            | 3.46 (2.99 to 3.96)                    | 3.15 (2.62 to 3.80)    | 3.81 (3.12 to 4.62)    | 3.69 (3.18 to 4.22)                 | 3.37 (2.79 to 4.05)    | 4.06 (3.31 to 4.92)   |
| Malignant skin melanoma                 | 1.44 (1.07 to 1.86)                    | 1.33 (0.80 to 1.75)    | 1.57 (0.98 to 2.28)    | 0.76 (0.54 to 1.00)                 | 0.62 (0.36 to 0.81)    | 0.92 (0.57 to 1.36)   |

|                                     |                        |                        |                        |                      |                     |                        |
|-------------------------------------|------------------------|------------------------|------------------------|----------------------|---------------------|------------------------|
| Mesothelioma                        | 0.37 (0.30 to 0.43)    | 0.23 (0.14 to 0.29)    | 0.53 (0.43 to 0.65)    | 0.30 (0.25 to 0.35)  | 0.18 (0.11 to 0.23) | 0.44 (0.35 to 0.53)    |
| Multiple myeloma                    | 1.58 (1.28 to 1.85)    | 1.41 (1.10 to 1.73)    | 1.77 (1.26 to 2.25)    | 1.24 (0.99 to 1.47)  | 1.06 (0.85 to 1.31) | 1.43 (1.02 to 1.83)    |
| Nasopharynx cancer                  | 0.18 (0.15 to 0.21)    | 0.10 (0.08 to 0.12)    | 0.27 (0.21 to 0.33)    | 0.15 (0.12 to 0.17)  | 0.07 (0.06 to 0.09) | 0.23 (0.19 to 0.29)    |
| Non-Hodgkin lymphoma                | 4.24 (3.66 to 4.90)    | 3.50 (2.89 to 4.28)    | 5.05 (4.13 to 6.14)    | 2.90 (2.51 to 3.30)  | 2.45 (2.04 to 2.96) | 3.40 (2.78 to 4.14)    |
| Non-melanoma skin cancer            | 35.66 (29.80 to 41.90) | 34.01 (28.19 to 40.22) | 37.69 (31.67 to 44.20) | 1.21 (1.03 to 1.39)  | 1.03 (0.85 to 1.22) | 1.43 (1.15 to 1.73)    |
| Other malignant neoplasms           | 9.13 (7.92 to 10.47)   | 8.98 (7.53 to 10.70)   | 9.36 (7.61 to 11.24)   | 4.41 (3.78 to 5.08)  | 3.95 (3.25 to 4.75) | 4.94 (3.97 to 6.00)    |
| Other pharynx cancer                | 0.28 (0.24 to 0.33)    | 0.14 (0.12 to 0.17)    | 0.45 (0.36 to 0.55)    | 0.24 (0.21 to 0.28)  | 0.11 (0.09 to 0.13) | 0.40 (0.32 to 0.48)    |
| Ovarian cancer                      | 4.29 (3.43 to 5.28)    | 8.12 (6.50 to 10.00)   | -                      | 2.78 (2.24 to 3.42)  | 5.21 (4.21 to 6.42) | -                      |
| Pancreatic cancer                   | 5.78 (4.97 to 6.64)    | 5.63 (4.64 to 6.81)    | 5.94 (4.79 to 7.28)    | 6.01 (5.16 to 6.87)  | 5.88 (4.88 to 7.07) | 6.13 (4.98 to 7.41)    |
| Prostate cancer                     | 24.09 (18.39 to 32.20) | -                      | 52.35 (40.04 to 70.09) | 8.78 (6.69 to 12.08) | -                   | 19.37 (14.77 to 26.70) |
| Stomach cancer                      | 9.70 (8.43 to 11.19)   | 8.53 (7.10 to 10.27)   | 11.05 (9.11 to 13.51)  | 8.86 (7.64 to 10.16) | 7.64 (6.35 to 9.17) | 10.28 (8.45 to 12.41)  |
| Testicular cancer                   | 2.83 (1.58 to 4.11)    | -                      | 5.76 (3.29 to 8.28)    | 0.52 (0.41 to 0.69)  | -                   | 1.08 (0.84 to 1.41)    |
| Thyroid cancer                      | 2.85 (2.40 to 3.36)    | 3.94 (3.20 to 4.81)    | 1.62 (1.29 to 2.00)    | 0.83 (0.71 to 0.95)  | 1.04 (0.86 to 1.25) | 0.58 (0.46 to 0.71)    |
| Tracheal, bronchus, and lung cancer | 9.52 (8.23 to 10.97)   | 6.41 (5.30 to 7.74)    | 13.17 (10.84 to 16.05) | 9.74 (8.36 to 11.24) | 6.27 (5.11 to 7.62) | 13.83 (11.31 to 16.66) |
| Uterine cancer                      | 2.86 (2.32 to 3.49)    | 5.40 (4.37 to 6.58)    | -                      | 0.79 (0.65 to 0.96)  | 1.47 (1.22 to 1.79) | -                      |

95% UI: 95% Uncertainty intervals

**Supplementary Table S2.** Percentage change from 1990 to 2019 in crude incidence and mortality due to 29 malignant neoplasms in Mexico.

| Group of cancer                         | Incidence (% of change 1990-2019, 95% UI) | Deaths (% of change 1990-2019, 95% UI) |
|-----------------------------------------|-------------------------------------------|----------------------------------------|
| Bladder cancer                          | 246 (195 to 308)                          | 174 (135 to 218)                       |
| Brain and central nervous system cancer | 129 (49 to 181)                           | 134 (54 to 189)                        |
| Breast cancer                           | 317 (238 to 411)                          | 185 (135 to 246)                       |
| Cervical cancer                         | 27 (-1 to 97)                             | 10 (-13 to 77)                         |
| Colon and rectum cancer                 | 421 (348 to 498)                          | 304 (251 to 365)                       |
| Esophageal cancer                       | 112 (80 to 149)                           | 107 (75 to 144)                        |
| Gallbladder and biliary tract cancer    | 61 (31 to 142)                            | 57 (28 to 134)                         |
| Hodgkin lymphoma                        | 70 (44 to 107)                            | 19 (0 to 41)                           |
| Kidney cancer                           | 291 (233 to 356)                          | 256 (197 to 316)                       |
| Larynx cancer                           | 75 (45 to 110)                            | 48 (22 to 76)                          |
| Leukemia                                | 34 (17 to 53)                             | 59 (37 to 81)                          |
| Lip and oral cavity cancer              | 170 (134 to 210)                          | 142 (110 to 178)                       |
| Liver cancer                            | 310 (254 to 371)                          | 314 (257 to 376)                       |
| Malignant skin melanoma                 | 436 (264 to 541)                          | 283 (147 to 361)                       |
| Mesothelioma                            | 210 (158 to 267)                          | 227 (173 to 291)                       |
| Multiple myeloma                        | 306 (239 to 374)                          | 270 (205 to 336)                       |
| Nasopharynx cancer                      | 137 (101 to 180)                          | 109 (75 to 147)                        |
| Non-Hodgkin lymphoma                    | 239 (191 to 289)                          | 170 (133 to 210)                       |
| Non-melanoma skin cancer                | 175 (168 to 181)                          | 162 (127 to 200)                       |
| Other malignant neoplasms               | 175 (135 to 216)                          | 113 (80 to 147)                        |
| Other pharynx cancer                    | 140 (102 to 183)                          | 110 (77 to 147)                        |
| Ovarian cancer                          | 236 (165 to 316)                          | 232 (164 to 304)                       |
| Pancreatic cancer                       | 199 (158 to 242)                          | 196 (155 to 240)                       |



|                                     |                  |                  |
|-------------------------------------|------------------|------------------|
| Prostate cancer                     | 385 (291 to 506) | 192 (141 to 255) |
| Stomach cancer                      | 100 (74 to 129)  | 77 (55 to 105)   |
| Testicular cancer                   | 312 (170 to 493) | 132 (69 to 189)  |
| Thyroid cancer                      | 338 (268 to 415) | 196 (154 to 240) |
| Tracheal, bronchus, and lung cancer | 86 (61 to 114)   | 82 (57 to 109)   |
| Uterine cancer                      | 377 (284 to 483) | 169 (122 to 226) |

95% UI: 95% Uncertainty intervals

**Supplementary Table S3.** Percentage change from 1990 to 2019 of age-standardized incidence and mortality rates (per 100,000 population) due to 29 malignant neoplasms in Mexico.

| Group of cancer                         | Incidence (% of change 1990-2019, 95% UI) | Deaths (% of change 1990-2019, 95% UI) |
|-----------------------------------------|-------------------------------------------|----------------------------------------|
| Bladder cancer                          | 22.06 (4.41 to 43.68)                     | -7.64 (-20.23 to 7.13)                 |
| Brain and central nervous system cancer | 26.00 (-19. to 55.08)                     | -17.4 (-24.02 to 45.4)                 |
| Breast cancer                           | 65.80 (34.4 to 102.9)                     | -9.27 (-9.54 to 32.0)                  |
| Cervical cancer                         | -47.9 (-59. to -17.3)                     | -58.2 (-67.02 to -30.7)                |
| Colon and rectum cancer                 | 89.22 (63.0 to 116.7)                     | -41.7 (-23.61 to 62.3)                 |
| Esophageal cancer                       | -24.9 (-36. to -12.1)                     | -28.2 (-39.18 to -15.6)                |
| Gallbladder and biliary tract cancer    | -42.6 (-53. to -13.6)                     | -44.9 (-55.07 to -18.1)                |
| Hodgkin lymphoma                        | -9.78 (-23. to 9.287)                     | -43.3 (-52.26 to -33.1)                |
| Kidney cancer                           | 72.40 (47.2 to 100.0)                     | -38.8 (-16.60 to 61.9)                 |
| Larynx cancer                           | -37.6 (-48. to -25.2)                     | -48.1 (-56.92 to -38.5)                |
| Leukemia                                | -6.29 (-17. to 6.600)                     | -4.89 (-17.32 to 8.29)                 |
| Lip and oral cavity cancer              | 0.431 (-12. to 14.84)                     | -14.1 (-25.30 to -1.94)                |
| Liver cancer                            | 54.60 (33.4 to 77.15)                     | -52.0 (-31.53 to 74.3)                 |
| Malignant skin melanoma                 | 116.8 (48.8 to 157.9)                     | -44.2 (-6.55 to 73.2)                  |
| Mesothelioma                            | 20.07 (0.45 to 41.67)                     | -24.2 (-3.96 to 48.2)                  |
| Multiple myeloma                        | 48.76 (23.1 to 74.08)                     | -34.3 (-9.56 to 58.3)                  |
| Nasopharynx cancer                      | -3.63 (-18. to 13.57)                     | -18.5 (-31.87 to -4.21)                |
| Non-Hodgkin lymphoma                    | 69.23 (47.1 to 93.10)                     | -20.9 (-5.03 to 38.0)                  |
| Non-melanoma skin cancer                | 1.194 (-0.0 to 2.446)                     | -9.73 (-20.82 to 2.86)                 |
| Other malignant neoplasms               | 47.69 (26.3 to 69.39)                     | -0.97 (-16.52 to 14.5)                 |
| Other pharynx cancer                    | -12.8 (-26. to 2.243)                     | -25.0 (-36.66 to -12.3)                |
| Ovarian cancer                          | 43.68 (13.1 to 77.44)                     | -27.3 (-1.47 to 55.1)                  |
| Pancreatic cancer                       | 7.057 (-7.6 to 22.42)                     | -4.63 (-9.69 to 19.9)                  |

|                                     |                       |                         |
|-------------------------------------|-----------------------|-------------------------|
| Prostate cancer                     | 63.61 (32.7 to 103.5) | -6.27 (-22.35 to 12.8)  |
| Stomach cancer                      | -29.1 (-38. to -19.0) | -38.7 (-46.25 to -29.4) |
| Testicular cancer                   | 190.6 (91.6 to 266.2) | -34.0 (-4.59 to 62.4)   |
| Thyroid cancer                      | 77.29 (49.6 to 107.6) | -6.86 (-7.70 to 22.2)   |
| Tracheal, bronchus, and lung cancer | -32.8 (-41. to -22.9) | -35.5 (-44.36 to -26.2) |
| Uterine cancer                      | 75.48 (41.5 to 114.1) | -5.86 (-21.80 to 13.6)  |

95% UI: 95% Uncertainty intervals
